# Supplementary material for: Effect of Spirulina platensis Supplementation on Carcass Characteristics, Fatty Acid Profile, and Meat Quality of Omani Goats
Source: MDPI journal article supplement (doi:10.3390/ani13182976), 2023-09-20
Supplement: s1 [file s1]

**Table S1.** The effects of SP on final live body weight, hot carcass weight (HCWT), cold carcass weight (CCWT) and dressing-out%, carcass linear dimensions and major cut weights (least square means  $\pm$  standard errors) of Jabbali and Sahrawi Omani goat breeds.

| Parameters                    | Jabbali                       |                              |                              |         | Sahrawi                        |                               |                               |         |
|-------------------------------|-------------------------------|------------------------------|------------------------------|---------|--------------------------------|-------------------------------|-------------------------------|---------|
|                               | CON                           | T1                           | T2                           | P value | CON                            | T1                            | T2                            | P value |
| Final Live BW (kg)            | 25.33 $\pm$ 1.27              | 25.77 $\pm$ 0.94             | 26.57 $\pm$ 1.09             | 0.458   | 21.03 $\pm$ 1.02               | 23.40 $\pm$ 0.56              | 22.73 $\pm$ 1.47              | 0.160   |
| HCWT (kg)                     | 11.09 $\pm$ 0.35              | 11.60 $\pm$ 0.35             | 12.26 $\pm$ 0.87             | 0.107   | 9.96 $\pm$ 0.78                | 10.84 $\pm$ 0.18              | 10.41 $\pm$ 0.62              | 0.385   |
| CCWT (kg)                     | 10.88 $\pm$ 0.34              | 11.39 $\pm$ 0.34             | 12.05 $\pm$ 0.87             | 0.137   | 9.70 $\pm$ 0.71                | 10.65 $\pm$ 0.17              | 10.20 $\pm$ 0.61              | 0.423   |
| Dressing-out (%) <sup>1</sup> | 43.87 $\pm$ 1.22              | 45.20 $\pm$ 2.75             | 46.06 $\pm$ 1.62             | 0.785   | 47.29 $\pm$ 2.38               | 46.34 $\pm$ 0.39              | 45.95 $\pm$ 2.25              | 0.698   |
| Gigwt (cm) <sup>2</sup>       | 13.07 $\pm$ 0.24              | 12.57 $\pm$ 0.58             | 12.70 $\pm$ 0.32             | 0.550   | 12.20 $\pm$ 0.40               | 12.17 $\pm$ 0.32              | 12.20 $\pm$ 0.72              | 0.887   |
| Wtsh (cm) <sup>3</sup>        | 17.33 $\pm$ 0.94              | 16.10 $\pm$ 1.29             | 18.20 $\pm$ 0.21             | 0.480   | 15.37 $\pm$ 0.43               | 15.40 $\pm$ 0.29              | 16.67 $\pm$ 0.58              | 0.337   |
| Msw (cm) <sup>4</sup>         | 13.10 $\pm$ 0.30              | 12.77 $\pm$ 0.24             | 12.83 $\pm$ 0.03             | 0.474   | 11.57 $\pm$ 0.34               | 12.17 $\pm$ 0.38              | 12.13 $\pm$ 0.50              | 0.648   |
| Leg Length (cm)               | 17.67 $\pm$ 0.27              | 17.63 $\pm$ 0.39             | 17.90 $\pm$ 0.35             | 0.598   | 17.40 <sup>ab</sup> $\pm$ 0.53 | 18.45 <sup>a</sup> $\pm$ 1.49 | 16.60 <sup>b</sup> $\pm$ 0.29 | 0.025   |
| Body Length (cm)              | 39.57 $\pm$ 0.53              | 39.73 $\pm$ 0.73             | 39.50 $\pm$ 0.55             | 0.272   | 39.10 <sup>b</sup> $\pm$ 0.81  | 43.30 <sup>a</sup> $\pm$ 2.87 | 38.27 <sup>b</sup> $\pm$ 0.52 | 0.045   |
| DepSst (cm) <sup>5</sup>      | 24.13 $\pm$ 0.13              | 24.47 $\pm$ 0.74             | 24.40 $\pm$ 0.42             | 0.565   | 24.23 $\pm$ 0.69               | 23.80 $\pm$ 0.65              | 23.45 $\pm$ 0.70              | 0.097   |
| Shol Weight (kg)              | 4.76 $\pm$ 0.25               | 5.01 $\pm$ 0.21              | 5.56 $\pm$ 0.38              | 0.151   | 4.43 $\pm$ 0.43                | 4.63 $\pm$ 0.16               | 4.62 $\pm$ 0.39               | 0.629   |
| Rack Weight (kg)              | 1.51 $\pm$ 0.03               | 1.71 $\pm$ 0.10              | 1.58 $\pm$ 0.13              | 0.271   | 1.22 <sup>b</sup> $\pm$ 0.04   | 1.54 <sup>a</sup> $\pm$ 0.03  | 1.42 <sup>ab</sup> $\pm$ 0.12 | 0.272   |
| Loin Weight (kg)              | 1.01 <sup>ab</sup> $\pm$ 0.08 | 1.06 <sup>a</sup> $\pm$ 0.05 | 0.98 <sup>b</sup> $\pm$ 0.06 | 0.019   | 0.83 $\pm$ 0.05                | 1.01 $\pm$ 0.06               | 0.88 $\pm$ 0.08               | 0.421   |
| Leg Weight (kg)               | 3.59 $\pm$ 0.14               | 3.59 $\pm$ 0.09              | 3.90 $\pm$ 0.31              | 0.924   | 3.31 $\pm$ 0.29                | 3.43 $\pm$ 0.03               | 3.28 $\pm$ 0.14               | 0.311   |

<sup>1</sup> Based on empty body weight, <sup>2</sup> Gigwt: gigot width, <sup>3</sup>Wtsh: Width behind shoulder, <sup>4</sup>Msw: Maximum Shoulder width and <sup>5</sup>DepSst: Depth from scapula to sternum. Means with different letters within the same row were significantly different ( $P < 0.05$ ).

**Table S2.** The effect of SP on non-carcass component (least square means  $\pm$  standard errors) of Jabbali and Sahrawi Omani goat breeds.

| Parameters <sup>1</sup>    | Jabbali                      |                               |                              |         | Sahrawi                      |                              |                               |         |
|----------------------------|------------------------------|-------------------------------|------------------------------|---------|------------------------------|------------------------------|-------------------------------|---------|
|                            | CON                          | T1                            | T2                           | P value | CON                          | T1                           | T2                            | P value |
| Head Weight (kg)           | 1.63 $\pm$ 0.02              | 1.79 $\pm$ 0.04               | 1.78 $\pm$ 0.12              | 0.170   | 1.48 $\pm$ 0.09              | 1.73 $\pm$ 0.03              | 1.57 $\pm$ 0.08               | 0.338   |
| Feet Weight (g/kg)         | 0.78 $\pm$ 0.04              | 0.68 $\pm$ 0.03               | 0.70 $\pm$ 0.04              | 0.316   | 0.56 $\pm$ 0.02              | 0.59 $\pm$ 0.03              | 0.60 $\pm$ 0.04               | 0.599   |
| Rumen full Weight (kg)     | 4.90 $\pm$ 0.56              | 5.00 $\pm$ 0.95               | 5.37 $\pm$ 0.27              | 0.786   | 3.67 $\pm$ 0.34              | 4.37 $\pm$ 0.18              | 4.32 $\pm$ 0.68               | 0.926   |
| Rumen empty Weight (kg)    | 1.98 $\pm$ 0.16              | 2.13 $\pm$ 0.15               | 2.25 $\pm$ 0.13              | 0.248   | 1.54 $\pm$ 0.05              | 1.69 $\pm$ 0.17              | 1.86 $\pm$ 0.17               | 0.716   |
| Lung Trachea Weight (g/kg) | 0.42 $\pm$ 0.15              | 0.26 $\pm$ 0.01               | 0.26 $\pm$ 0.01              | 0.543   | 0.38 $\pm$ 0.09              | 0.27 $\pm$ 0.01              | 0.35 $\pm$ 0.09               | 0.838   |
| Heart Weight (g/kg)        | 0.36 $\pm$ 0.27              | 0.09 <sup>b</sup> $\pm$ 0.01  | 0.09 <sup>b</sup> $\pm$ 0.01 | 0.667   | 0.09 $\pm$ 0.00              | 0.09 $\pm$ 0.01              | 0.25 $\pm$ 0.17               | 0.834   |
| Spleen Weight (g/kg)       | 0.05 $\pm$ 0.01              | 0.05 $\pm$ 0.00               | 0.05 $\pm$ 0.00              | 0.977   | 0.05 $\pm$ 0.00              | 0.06 $\pm$ 0.01              | 0.06 $\pm$ 0.01               | 0.216   |
| Liver Weight (g/kg)        | 0.45 $\pm$ 0.04              | 0.51 $\pm$ 0.04               | 0.49 $\pm$ 0.03              | 0.317   | 0.35 $\pm$ 0.00              | 0.45 $\pm$ 0.05              | 0.40 $\pm$ 0.04               | 0.815   |
| Omental Fat Weight (g/kg)  | 0.23 <sup>b</sup> $\pm$ 0.02 | 0.20 <sup>b</sup> $\pm$ 0.01  | 0.34 <sup>a</sup> $\pm$ 0.02 | 0.151   | 0.15 <sup>b</sup> $\pm$ 0.02 | 0.25 <sup>a</sup> $\pm$ 0.05 | 0.20 <sup>ab</sup> $\pm$ 0.04 | 0.711   |
| Kidney Weight (g/kg)       | 0.29 <sup>a</sup> $\pm$ 0.21 | 0.06 <sup>b</sup> $\pm$ 0.01  | 0.06 <sup>b</sup> $\pm$ 0.01 | 0.151   | 0.06 $\pm$ 0.01              | 0.07 $\pm$ 0.00              | 0.06 $\pm$ 0.00               | 0.714   |
| Kidney Fat Weight (g/kg)   | 0.06 <sup>b</sup> $\pm$ 0.02 | 0.09 <sup>ab</sup> $\pm$ 0.02 | 0.15 <sup>a</sup> $\pm$ 0.01 | 0.094   | 0.06 <sup>b</sup> $\pm$ 0.01 | 0.13 <sup>a</sup> $\pm$ 0.03 | 0.09 <sup>ab</sup> $\pm$ 0.02 | 0.448   |
| Mesfat Weight (g/kg)       | 0.17 $\pm$ 0.04              | 0.18 $\pm$ 0.02               | 0.19 $\pm$ 0.02              | 0.409   | 0.14 $\pm$ 0.02              | 0.15 $\pm$ 0.07              | 0.13 $\pm$ 0.04               | 0.506   |
| Mesenteric fat (g/kg)      | 0.17 $\pm$ 0.01              | 0.16 $\pm$ 0.02               | 0.23 $\pm$ 0.03              | 0.173   | 0.10 $\pm$ 0.00              | 0.14 $\pm$ 0.04              | 0.10 $\pm$ 0.01               | 0.526   |
| Skin (kg)                  | 2.37 $\pm$ 0.29              | 2.23 $\pm$ 0.10               | 2.23 $\pm$ 0.17              | 0.352   | 1.69 $\pm$ 0.22              | 1.84 $\pm$ 0.03              | 1.77 $\pm$ 0.19               | 0.806   |

<sup>1</sup> all parameters are measured by kilogram. Means with different letters within the same row were significantly different ( $P < 0.05$ ).

**Table S3.** Least square means  $\pm$  standard errors of the SP effects on meat quality characteristics of Longissimus Dorsi in Jabbali and Sahrawi breeds.

| Parameters                                       | Jabbali          |                  |                  |         | Sahrawi                        |                               |                               |         |
|--------------------------------------------------|------------------|------------------|------------------|---------|--------------------------------|-------------------------------|-------------------------------|---------|
|                                                  | CON              | T1               | T2               | P value | CON                            | T1                            | T2                            | P value |
| Ultimate ph                                      | 5.38 $\pm$ 0.30  | 5.42 $\pm$ 0.23  | 5.64 $\pm$ 0.12  | 0.987   | 5.19 <sup>b</sup> $\pm$ 0.09   | 5.84 <sup>a</sup> $\pm$ 0.17  | 5.22 <sup>b</sup> $\pm$ 0.12  | 0.126   |
| Sarcomere length (lm)                            | 10.00 $\pm$ 0.42 | 9.50 $\pm$ 0.69  | 9.67 $\pm$ 0.67  | 0.707   | 8.17 $\pm$ 0.95                | 9.67 $\pm$ 0.76               | 8.78 $\pm$ 0.46               | 0.183   |
| EJ (drip loss) (g/cm <sup>2</sup> ) <sup>1</sup> | 19.67 $\pm$ 6.63 | 21.63 $\pm$ 3.71 | 22.20 $\pm$ 3.27 | 0.078   | 29.43 $\pm$ 4.11               | 20.93 $\pm$ 1.14              | 27.10 $\pm$ 1.08              | 0.293   |
| Cook loss (%)                                    | 41.20 $\pm$ 3.31 | 37.73 $\pm$ 3.43 | 38.60 $\pm$ 4.33 | 0.976   | 41.27 $\pm$ 3.54               | 33.63 $\pm$ 3.59              | 41.57 $\pm$ 2.23              | 0.836   |
| WBV (kg) <sup>2</sup>                            | 5.50 $\pm$ 1.71  | 4.13 $\pm$ 1.01  | 5.93 $\pm$ 0.83  | 0.268   | 4.80 $\pm$ 1.30                | 4.90 $\pm$ 1.13               | 6.17 $\pm$ 0.58               | 0.528   |
| L* (lightness)                                   | 44.79 $\pm$ 0.97 | 44.63 $\pm$ 0.43 | 47.54 $\pm$ 1.56 | 0.195   | 45.00 <sup>ab</sup> $\pm$ 2.21 | 41.52 <sup>b</sup> $\pm$ 0.62 | 46.55 <sup>a</sup> $\pm$ 1.49 | 0.685   |
| a* (redness)                                     | 21.31 $\pm$ 1.41 | 22.27 $\pm$ 0.88 | 22.58 $\pm$ 1.15 | 0.787   | 19.49 $\pm$ 2.16               | 23.26 $\pm$ 1.09              | 21.14 $\pm$ 0.99              | 0.536   |
| b* (yellowness)                                  | 5.65 $\pm$ 0.20  | 5.61 $\pm$ 1.01  | 5.89 $\pm$ 1.46  | 0.625   | 4.95 $\pm$ 0.99                | 4.53 $\pm$ 0.45               | 6.06 $\pm$ 0.91               | 0.567   |

<sup>1</sup>EJ (Expressed juice) = water area (cm<sup>2</sup>)/sample weight (g). <sup>2</sup> WBV = Warner–Bratzler values. Means with different letters within the same row were significantly different ( $P < 0.05$ ).

**Table S4.** Least square means  $\pm$  standard errors of the SP effects on meat quality characteristics of *semitendinosus* muscles in Jabbali and Sahrawi breeds.

| Parameters                                       | Jabbali          |                  |                  |         | Sahrawi                        |                               |                               |         |
|--------------------------------------------------|------------------|------------------|------------------|---------|--------------------------------|-------------------------------|-------------------------------|---------|
|                                                  | CON              | T1               | T2               | P value | CON                            | T1                            | T2                            | P value |
| Ultimate Ph                                      | 5.97 $\pm$ 0.33  | 6.02 $\pm$ 0.43  | 6.37 $\pm$ 0.13  | 0.881   | 6.08 <sup>ab</sup> $\pm$ 0.24  | 6.30 <sup>a</sup> $\pm$ 0.06  | 5.73 <sup>b</sup> $\pm$ 0.08  | 0.725   |
| Sarcomere length (lm)                            | 6.39 $\pm$ 0.20  | 5.83 $\pm$ 0.35  | 5.83 $\pm$ 0.10  | 0.611   | 6.72 $\pm$ 0.97                | 7.06 $\pm$ 0.82               | 6.72 $\pm$ 1.06               | 0.889   |
| EJ (drip loss) (g/cm <sup>2</sup> ) <sup>1</sup> | 28.97 $\pm$ 3.55 | 24.17 $\pm$ 6.21 | 26.60 $\pm$ 2.04 | 0.850   | 19.97 $\pm$ 3.46               | 21.47 $\pm$ 3.26              | 27.03 $\pm$ 2.44              | 0.370   |
| Cook loss (%)                                    | 48.57 $\pm$ 5.66 | 37.40 $\pm$ 8.31 | 36.87 $\pm$ 7.33 | 0.655   | 45.33 $\pm$ 7.51               | 34.73 $\pm$ 2.86              | 44.33 $\pm$ 3.92              | 0.301   |
| Tender (kg)                                      | 3.57 $\pm$ 0.88  | 3.77 $\pm$ 1.05  | 2.50 $\pm$ 0.20  | 0.546   | 2.87 $\pm$ 0.33                | 2.7 $\pm$ 0.44                | 4.27 $\pm$ 0.35               | 0.748   |
| L* (lightness)                                   | 51.65 $\pm$ 2.72 | 54.68 $\pm$ 1.81 | 51.50 $\pm$ 0.84 | 0.684   | 46.50 <sup>ab</sup> $\pm$ 0.81 | 43.41 <sup>b</sup> $\pm$ 0.82 | 48.69 <sup>a</sup> $\pm$ 0.65 | 0.088   |
| a* (redness)                                     | 19.31 $\pm$ 1.20 | 18.02 $\pm$ 0.78 | 19.86 $\pm$ 0.51 | 0.993   | 20.97 $\pm$ 0.41               | 20.81 $\pm$ 0.80              | 20.73 $\pm$ 0.46              | 0.720   |
| b* (yellowness)                                  | 4.91 $\pm$ 0.26  | 4.93 $\pm$ 1.21  | 5.56 $\pm$ 0.09  | 0.894   | 4.81 $\pm$ 0.24                | 4.65 $\pm$ 0.45               | 5.49 $\pm$ 0.47               | 0.494   |

<sup>1</sup>EJ (Expressed juice) = water area (cm<sup>2</sup>)/sample weight (g). Means with different letters within the same row were significantly different ( $P < 0.05$ ).

**Table S5.** The effects of SP on fatty acid profile (g/100 g FA), groups (g/100 g fat), ratios, and indexes of Longissimus dorsi of Omani goats.

| Fatty acid       | Jabbali          |                  |                  |         | Sahrawi                        |                                |                               |         |
|------------------|------------------|------------------|------------------|---------|--------------------------------|--------------------------------|-------------------------------|---------|
|                  | CON              | T1               | T2               | P value | CON                            | T1                             | T2                            | P value |
| C10:0            | 0.05 $\pm$ 0.01  | 0.06 $\pm$ 0.02  | 0.08 $\pm$ 0.03  | 0.896   | 0.15 $\pm$ 0.09                | 0.11 $\pm$ 0.08                | 0.14 $\pm$ 0.03               | 0.055   |
| C12:0            | 0.06 $\pm$ 0.02  | 0.06 $\pm$ 0.03  | 0.25 $\pm$ 0.22  | 0.980   | 0.24 $\pm$ 0.12                | 0.41 $\pm$ 0.38                | 0.27 $\pm$ 0.07               | 0.025   |
| C13:0            | 0.01 $\pm$ 0.00  | 0.01 $\pm$ 0.00  | 0.01 $\pm$ 0.01  | 0.856   | 0.05 $\pm$ 0.01                | 0.40 $\pm$ 0.39                | 0.03 $\pm$ 0.01               | 0.012   |
| C14:0            | 0.98 $\pm$ 0.27  | 1.00 $\pm$ 0.63  | 1.47 $\pm$ 0.61  | 0.922   | 2.32 <sup>ab</sup> $\pm$ 0.63  | 1.17 <sup>b</sup> $\pm$ 0.85   | 3.52 <sup>a</sup> $\pm$ 0.87  | 0.020   |
| C15:0            | 0.25 $\pm$ 0.07  | 0.26 $\pm$ 0.18  | 0.28 $\pm$ 0.06  | 0.867   | 0.66 <sup>a</sup> $\pm$ 0.19   | 0.07 <sup>b</sup> $\pm$ 0.01   | 0.98 <sup>a</sup> $\pm$ 0.26  | 0.000   |
| C16:0            | 6.93 $\pm$ 1.01  | 6.94 $\pm$ 3.12  | 11.08 $\pm$ 3.89 | 0.952   | 11.23 $\pm$ 2.52               | 10.53 $\pm$ 6.74               | 16.67 $\pm$ 3.24              | 0.121   |
| C17:0            | 0.90 $\pm$ 0.20  | 1.00 $\pm$ 0.65  | 0.96 $\pm$ 0.13  | 0.966   | 1.91 <sup>a</sup> $\pm$ 0.54   | 0.49 <sup>b</sup> $\pm$ 0.23   | 2.52 <sup>a</sup> $\pm$ 0.59  | 0.000   |
| C18:0            | 6.82 $\pm$ 0.89  | 7.64 $\pm$ 4.02  | 8.69 $\pm$ 1.15  | 0.892   | 11.36 <sup>a</sup> $\pm$ 2.87  | 6.11 <sup>b</sup> $\pm$ 2.48   | 16.14 <sup>a</sup> $\pm$ 3.18 | 0.001   |
| C20:0            | 0.23 $\pm$ 0.14  | 0.22 $\pm$ 0.13  | 0.27 $\pm$ 0.12  | 0.660   | 0.28 $\pm$ 0.11                | 2.34 $\pm$ 2.23                | 0.62 $\pm$ 0.03               | 0.241   |
| C24:0            | 0.06 $\pm$ 0.02  | 0.09 $\pm$ 0.02  | 0.06 $\pm$ 0.02  | 0.003   | 0.08 $\pm$ 0.02                | 0.11 $\pm$ 0.02                | 0.10 $\pm$ 0.01               | 0.007   |
| Sfa <sup>1</sup> | 16.19 $\pm$ 2.46 | 17.10 $\pm$ 8.71 | 23.04 $\pm$ 5.76 | 0.943   | 28.04 <sup>ab</sup> $\pm$ 6.84 | 19.95 <sup>b</sup> $\pm$ 11.68 | 40.57 <sup>a</sup> $\pm$ 8.29 | 0.040   |

|                           |                         |                         |                         |       |                           |                          |                          |       |
|---------------------------|-------------------------|-------------------------|-------------------------|-------|---------------------------|--------------------------|--------------------------|-------|
| C13:1                     | 0.02±0.00               | 0.06±0.04               | 0.02±0.00               | 0.980 | 0.05±0.02                 | 0.89±0.88                | 0.06±0.02                | 0.005 |
| C14:1                     | 0.08±0.02               | 0.07±0.05               | 0.09±0.02               | 0.692 | 0.21 <sup>a</sup> ±0.07   | 0.02 <sup>b</sup> ±0.01  | 0.31 <sup>a</sup> ±0.08  | 0.000 |
| C16:1                     | 0.24 <sup>a</sup> ±0.07 | 0.09 <sup>b</sup> ±0.03 | 0.27 <sup>a</sup> ±0.06 | 0.000 | 0.33 <sup>b</sup> ±0.12   | 0.17 <sup>b</sup> ±0.07  | 0.70 <sup>a</sup> ±0.18  | 0.005 |
| C17:1                     | 0.74±0.19               | 0.73±0.43               | 1.00±0.38               | 0.876 | 1.93 <sup>a</sup> ±0.56   | 0.24 <sup>b</sup> ±0.02  | 1.94 <sup>a</sup> ±0.44  | 0.000 |
| C16:1Cis9                 | 1.34±0.32               | 1.73±1.10               | 1.31±0.17               | 0.954 | 2.30 <sup>b</sup> ±0.63   | 0.75 <sup>c</sup> ±0.33  | 4.54 <sup>a</sup> ±1.09  | 0.001 |
| C18:1Cisn9                | 14.22±2.16              | 14.57±6.33              | 19.90±4.89              | 0.906 | 25.81±6.40                | 19.42±12.13              | 30.23±5.44               | 0.027 |
| Mufa <sup>2</sup>         | 16.63±2.75              | 17.25±7.90              | 22.58±4.97              | 0.914 | 30.63±7.61                | 21.47±13.37              | 37.79±7.18               | 0.024 |
| C18:2Cisn6                | 3.60±1.07               | 2.55±0.81               | 2.93±0.88               | 0.348 | 1.83 <sup>b</sup> ±0.56   | 4.64 <sup>a</sup> ±1.62  | 4.46 <sup>a</sup> ±0.76  | 0.000 |
| C20:3n6                   | 0.15±0.04               | 0.06 <sup>b</sup> ±0.00 | 0.05 <sup>b</sup> ±0.00 | 0.586 | 0.07±0.01                 | 0.07±0.01                | 0.17±0.09                | 0.824 |
| C20:4n6                   | 0.81±0.06               | 0.88±0.10               | 0.68±0.08               | 0.174 | 0.95 <sup>b</sup> ±0.14   | 2.16 <sup>a</sup> ±0.77  | 0.78 <sup>b</sup> ±0.10  | 0.001 |
| C22:4n6                   | 0.11±0.01               | 0.09±0.02               | 0.12±0.02               | 0.757 | 0.18±0.04                 | 0.13±0.01                | 0.12±0.02                | 0.001 |
| Pufa n-6 <sup>3</sup>     | 4.61±1.06               | 3.58±0.87               | 3.77±0.86               | 0.307 | 3.03 <sup>b</sup> ±0.56   | 6.95 <sup>a</sup> ±2.25  | 5.45 <sup>a</sup> ±0.77  | 0.000 |
| C18:3Cisn3                | 0.09±0.01               | 0.11±0.06               | 0.11±0.02               | 0.974 | 0.13 <sup>b</sup> ±0.04   | 0.07 <sup>b</sup> ±0.01  | 0.23 <sup>a</sup> ±0.04  | 0.019 |
| cis-5,8,11-Eicosatrienoic | 0.18±0.02               | 0.15±0.04               | 0.18±0.02               | 0.993 | 0.27±0.07                 | 0.56±0.41                | 0.28±0.06                | 0.008 |
| Pufa n-3 <sup>4</sup>     | 0.26±0.02               | 0.25±0.09               | 0.23±0.03               | 0.957 | 0.40±0.09                 | 0.62±0.40                | 0.51±0.09                | 0.018 |
| n-6/n-3 ratio             | 18.81±5.60              | 21.52±6.21              | 22.07±6.44              | 0.207 | 14.60 <sup>ab</sup> ±3.91 | 21.98 <sup>a</sup> ±4.39 | 11.77 <sup>b</sup> ±1.20 | 0.001 |

<sup>1</sup> Sfa, Total saturated fatty acids; <sup>2</sup> Mufa, total monounsaturated fatty acids; <sup>3</sup> Pufa n-6, total omega-6 polyunsaturated fatty acids; <sup>4</sup> Pufa n-3, total omega-3 polyunsaturated fatty acids. Means with different letters within the same row were significantly different ( $P<0.05$ ).

**Table S6:** Basal diet components mean fatty acid composition (% total FA).

| Type of feed           | Spirulina | concentrate | Rohds  |
|------------------------|-----------|-------------|--------|
| C10:0                  | 0.042     | 0.020       | 0.061  |
| C12:0                  | 0.025     | -           | 0.097  |
| C13                    | 0.338     | 0.150       | 0.083  |
| C14:0                  | 0.268     | 0.083       | -      |
| C15:0                  | 0.046     | 0.026       | 0.026  |
| C16:0                  | 28.544    | -           | 1.539  |
| C16:1 <i>Cis</i> 9     | 6.587     | 0.078       | -      |
| C17:0                  | 0.307     | 0.048       | 0.035  |
| C17:1                  | 0.387     | 0.016       | -      |
| C18:2 <i>Cis</i> (n6)  | 0.420     | -           | -      |
| C18:0                  | 1.319     | 0.849       | 0.264  |
| C18:1 <i>Cis</i> (n9)  | 4.163     | 6.952       | 0.254  |
| C18:2 <i>Cis</i> (n6)  | 17.024    | 10.146      | 0.661  |
| C20:0                  | 0.104     | 0.212       | 0.074  |
| C:18:3 <i>Cis</i> (n3) | 14.619    | 0.222       | 1.211  |
| C21:0                  | 15.000    | -           | 15.000 |
| C20:3 (n6)             | 0.200     | 0.285       | -      |
| C20:5 (n3)             | 0.096     | -           | -      |
| C22:6 (n3)             | 0.088     | -           | -      |
